# Supplementary material
Source: publisher figshare collection journal article supplement (https://acs.figshare.com/ndownloader/files/3939757)
Supplement: Supplementary file 1 [file 3939757]

## **Carbon Nanotube-Templated Synthesis of Covalent Porphyrin Network for Oxygen Reduction Reaction.**

Ismail Hijazi,<sup>†</sup> Tiphaine Bourgeteau,<sup>†</sup> Renaud Cornut,<sup>†</sup> Adina Morozan,<sup>†</sup> Arianna Filoramo,<sup>†</sup> Jocelyne Leroy,<sup>†</sup> Vincent Derycke,<sup>†</sup> Bruno Joussetme<sup>†</sup> and Stéphane Campidelli<sup>\*,†</sup>

<sup>†</sup>CEA Saclay, IRAMIS, NIMBE, Laboratoire d'Innovation en Chimie des Surfaces et Nanosciences (LICSEN), F-91191 Gif sur Yvette, France.

### Synthesis and representation of the physisorbed MWNT/CoP hybrid.

**MWNT/CoP hybrid.** A suspension of 15 mg of porphyrin **3** (5,10,15,20-Tetrakis[(trimethylsilyl)ethynyl]porphyrinato Co(II)) and MWNTs (10 mg) in THF (15 ml) were sonicated with sonic bath 160 W max for 35 min (100% for 5 min and then 60% for 30 min). The THF was evaporated with nitrogen stream and the resulting solid was used to prepare the ink as described in the experimental section “*ORR experiments. Sample preparation*”

### Estimation of the number of carbon atoms in a 1 nm section of nanotube.

First, we determined by molecular modeling using HyperChem 8.0 software that a tetraethynylporphyrin has an area of  $1 \text{ nm}^2$ . So for the estimation of the number of carbon atoms, we assume that one porphyrin occupies an arc of 1 nm of the outer shell on a length of 1 nm of nanotube. The outer diameter is 9.5 nm (average diameter from Nanocyl); by TEM, we estimated that the average number of walls in the nanotubes is 8 (each walls being separated of 0.34 nm). In graphene,  $1 \text{ nm}^2$  contains 40 carbon atoms.

| diameter $r_n$ (nm) | Area <sup>a</sup> ( $\text{nm}^2$ ) | Nb of carbon |
|---------------------|-------------------------------------|--------------|
| 9.50                | 1                                   | 40           |
| 9.16                | 0.96                                | 38           |
| 8.82                | 0.93                                | 37           |
| 8.48                | 0.89                                | 36           |
| 8.14                | 0.85                                | 34           |
| 7.80                | 0.82                                | 33           |
| 7.46                | 0.78                                | 31           |
| 7.12                | 0.75                                | 30           |

<sup>a</sup>Area = Arc<sub>n</sub>·length; with length = 1 nm and Arc<sub>n</sub> =  $r_n \cdot \theta$ .

$$\theta = 1/9.5 = 0.105 \text{ rad } (\sim 6^\circ)$$

The total carbon represents 280 atoms for 1 porphyrin.

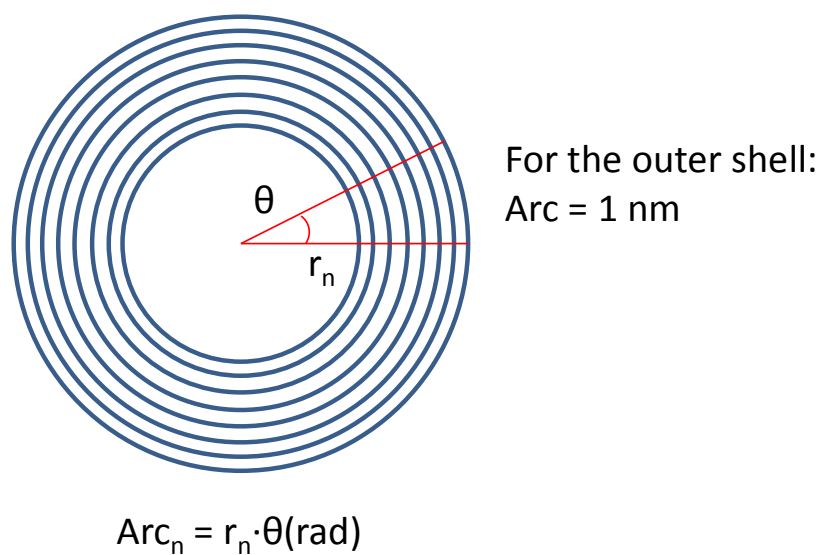

**Figure S1.** Representation of the geometry of a 9.5 nm diameter MWNT containing 8 walls.

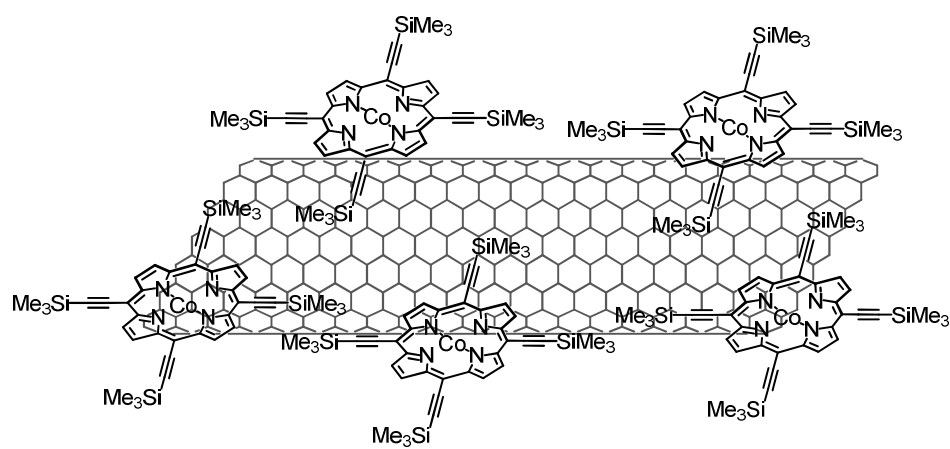

**Figure S2.** Representation of the physisorbed MWNT/CoP hybrid.

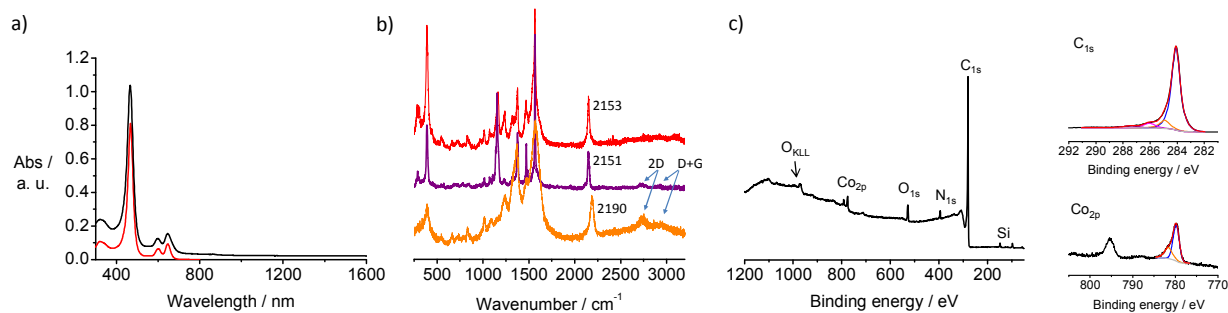

**Figure S3.** a) Absorption spectra of the physisorbed MWNT/CoP hybrid (in black) and of *meso*-tetra(trimethylsilylethynyl)-porphyrinato cobalt (II) **3** (in red) in NMP. b) Raman spectra of MWNT/CoP hybrid (purple) and of MWNT-CoP **1** (orange) and CoP monomer **3** (red), for comparison. The position of the bands corresponding to the stretching mode of the triple bonds is given in  $\text{cm}^{-1}$ . c) XPS spectrum of the physisorbed MWNT/CoP hybrid and deconvoluted XPS core level spectra of carbon  $\text{C}_{1s}$ , and  $\text{Co}_{2p}$ .

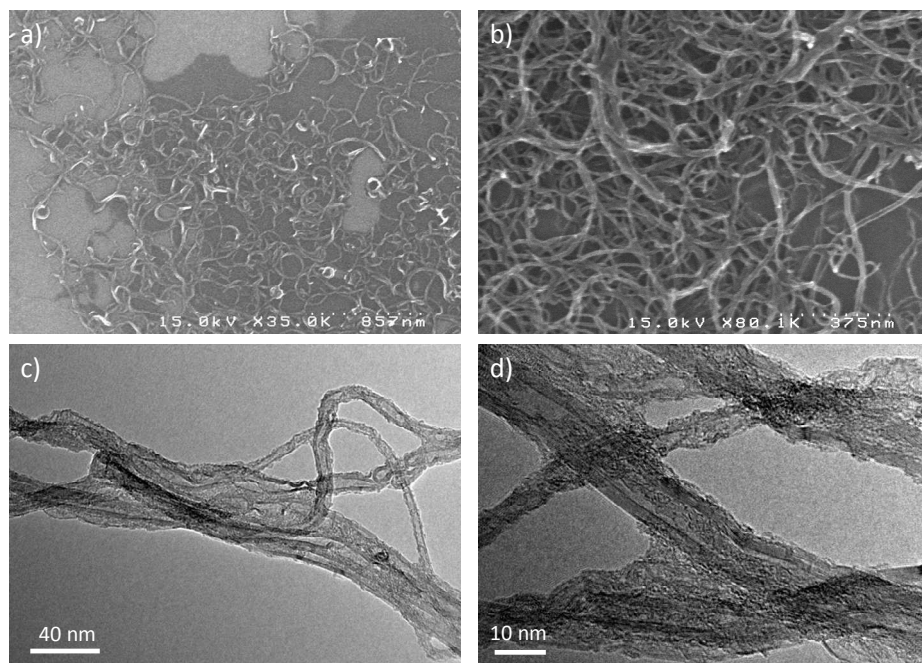

**Figure S4.** SEM (a-b) and TEM (c-d) micrographs of the physisorbed MWNT/CoP hybrid. SEM images show that upon drying the porphyrins form a puddle on the surface around the nanotubes. Conversely to MWNT-CoP **1**, in the physisorbed hybrid, the porphyrins are not bound to each other around the nanotubes. The TEM images show the presence of a thin and discontinuous layer of porphyrins around the nanotubes.

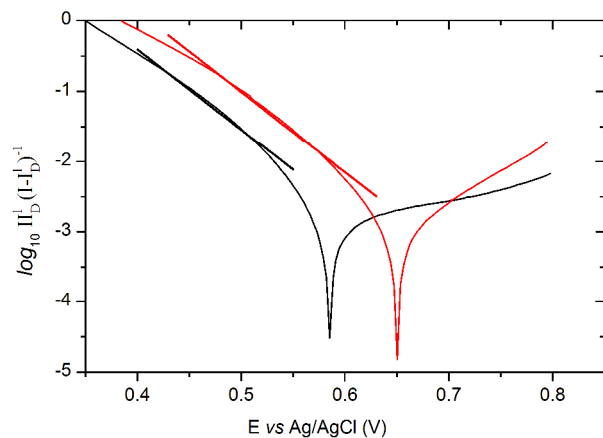

**Figure S5.** Mass transfer corrected Tafel plots  $\text{Log}_{10} (I_D II_D^{-1} (1-I_D)^{-1})$  vs potential for predeposited MWNT-CoP **1** (red) and physisorbed MWNT/CoP (black) catalysts on GC. The polarization curves have been recorded at 400 rpm in  $\text{O}_2$ -saturated 0.5 M  $\text{H}_2\text{SO}_4$  solution (scan rate =  $5 \text{ mV.s}^{-1}$ ,  $25^\circ\text{C}$ ). The loading is  $155 \mu\text{g.cm}^{-2}$ , which corresponds to the same amount (17 nmol) of porphyrins in both samples.  $I_D$  = experimental diffusion limited current. The fittings of the linear parts in figure S5 lead to a ratio of 3.6 between the exchange currents of the MWNT-CoP **1** and the MWNT/CoP.

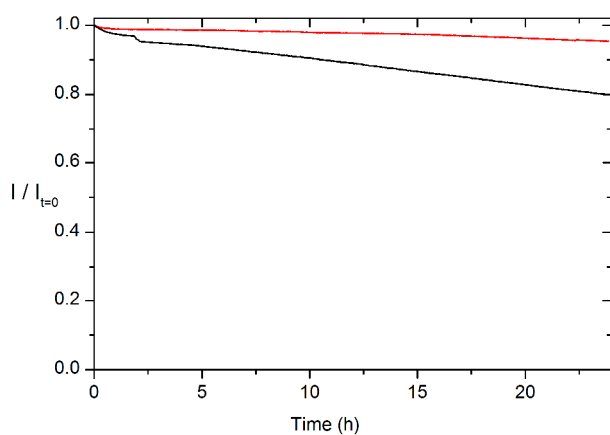

**Figure S6.** Normalized chronoamperometry recorded for ORR in  $\text{O}_2$ -saturated 0.5 M  $\text{H}_2\text{SO}_4$  solution (rotating speed 60rpm,  $25^\circ\text{C}$ ) on GC with predeposited MWNT-CoP **1** (red line) and physisorbed MWNT/CoP (black line). The loading is  $155 \mu\text{g.cm}^{-2}$ .  $E_w=0.2 \text{ V vs Ag/AgCl}$ . The recording started after stabilization at 0.2 V vs Ag/AgCl for 10 min.

**Table S1** Summary of the XPS data for C<sub>1s</sub>, N<sub>1s</sub> and Co<sub>2p</sub>.

| Compound                | Binding energy eV<br>(area CPS·eV)                                                                                                                                                                                       | Number of porphyrin <sup>a</sup>  |
|-------------------------|--------------------------------------------------------------------------------------------------------------------------------------------------------------------------------------------------------------------------|-----------------------------------|
| MWNT-CoP <b>1</b>       | C <sub>1</sub> 284.0 (8735)<br>C <sub>2</sub> 284.8 (3546)<br>C <sub>3</sub> 286.0 (1991)<br>C <sub>4</sub> 287.6 (1796)<br>C <sub>tot</sub> (16068)<br>N <sub>1s</sub> 398.4 (1312)<br>Co <sub>2p3/2</sub> 780.5 (1528) | 1 CoP for 90 C<br>1 CoP for 130 C |
| MWNT/CoP<br>physisorbed | C <sub>1</sub> 284.1 (13064)<br>C <sub>2</sub> 284.9 (1537)<br>C <sub>3</sub> 286.0 (960)<br>C <sub>4</sub> 287.5 (601)<br>C <sub>tot</sub> (16162)<br>Co <sub>2p3/2 tot</sub> (1509)                                    | 1 CoP for 135 C                   |

<sup>a</sup>Scofield factor used for the calculation: C<sub>1s</sub>=1; N<sub>1s</sub>=1.8; Co<sub>2p3/2</sub>=12.62; for Al K $\alpha$  X-rays; estimated with the ratio (corrected by the Scofield factor) C<sub>tot</sub>/0.25N<sub>1s</sub> and C<sub>tot</sub>/Co<sub>2p3/2</sub>.
